# Supplementary material
Source: publisher figshare collection journal article supplement (https://gsapubs.figshare.com/ndownloader/files/23307578)
Supplement: Supplementary file 1 [file 23307578]

**Fame, M.L., Spotila, J.A., Owen, L.A., Dortch, J.M., and Shuster, D.L., 2018,  
Spatially heterogeneous post-Caledonian burial and exhumation across the Scottish  
Highlands: Lithosphere, <https://doi.org/10.1130/L678.1>.**

**GSA Data Repository Item 2018139**

## **Supplementary Material**

### **SUPPLEMENT 1. AHe AND AFT AGES FROM PRIOR WORK ACROSS THE SCOTTISH HIGHLANDS**

Figure DR1. The map area is from inset II in Figure 2 and all ages are in millions of years (Ma). AFTA ages, in boxes without outlines, from previous studies are represented by white squares (Thomson et al., 1999), black squares (Holford et al., 2009) and white diamonds (Jolivet, 2007). Grey squares show the sample locations and AFTA ages, in boxes without outlines, and AHe ages, in boxes with black outlines, from Sgorr Dhonuill (SD) (Persano et al., 2007). White circles show sample locations from this study with AHe ages in larger font than summarized prior work.

### **SUPPLEMENT 2. AGE VERSUS eU FOR ALL AGE DETERMINATIONS**

Figure DR2: Each graph displays age versus eU (effective Uranium) for all individual age determinations for all aliquots of each apatite sample analyzed. Grey points show age determinations that were used in calculation of the mean AHe age and white diamonds represent age determinations deemed anomalous (see text for discussion) and were culled prior to the calculation of mean AHe age (Table 1).

## SUPPLEMENT 3. QTQT FORWARD MODEL INPUT PARAMETERS

Table DR1. Qtqt forward model (figure 4) input parameters

## SUPPLEMENT 4. APATITE $^4\text{He}/^3\text{He}$ THERMOCHRONOMETRY

### $^4\text{He}/^3\text{He}$ Methods

Apatite  $^4\text{He}/^3\text{He}$  thermochronometry more tightly constrains the t-T path of an individual apatite as it cooled through the PRZ than does its bulk AHe age alone (Shuster and Farley, 2005, 2004). We analyzed four low-elevation samples using  $^4\text{He}/^3\text{He}$  thermochronometry, samples ScT1 from Invershiel, ScT2 from Cluanie, and samples ScT10 and ScT11 from Glen Nevis to better define the most recent cooling histories. We conducted  $^4\text{He}/^3\text{He}$  thermochronometry at the Noble Gas Thermochronometry Lab of the Berkley Geochronology Center following analytical methods detailed in Tremblay et al. (2015). After irradiation with 220 MeV protons, we selected single, euhedral crystals for analysis (Shuster and Farley, 2005). We then sequentially degassed the sample using a feedback-controlled diode laser; the molar abundance of  $^3\text{He}$  and  $^4\text{He}/^3\text{He}$  ratio was then measured at each heating step using sector-field mass spectrometry. The  $^4\text{He}/^3\text{He}$  release spectrum is displayed as a ratio evolution diagram where the  $^4\text{He}/^3\text{He}$  ratio of each step ( $R_{\text{step}}$ ) is normalized to the bulk  $^4\text{He}/^3\text{He}$  ratio ( $R_{\text{bulk}}$ ) of the sample, and is plotted against the cumulative released fraction of  $^3\text{He}$  ( $\Sigma F_{^3\text{He}}$ ) (Shuster and Farley, 2005, 2004; Shuster et al., 2003) (Table DR2, Fig. DR3). Assuming a spatially uniform production of radiogenic  $^4\text{He}$ , the data should fall within an allowable envelope between end member profiles produced by steady state production/diffusion and alpha ejection alone (Farley et al., 2010). U-Th zonation, which may skew the initial spatial distribution of  $^4\text{He}$

production, or other yet unknown systematics affecting the final form of the diffusion distribution may cause  $^4\text{He}/^3\text{He}$  data at particular steps to plot within the ‘forbidden zone’ outside of the end-member envelopes (Shuster and Farley, 2005, 2004). We removed such steps prior to interpreting the data and using the random search algorithm described in Schildgen et al. (2010) using RDAAM parameters (Flowers et al., 2009).

## $^4\text{He}/^3\text{He}$ Results and Modeling

ScT2’s  $^4\text{He}/^3\text{He}$  ratio evolution diagram, representing its He diffusion profile (Table DR2), overlain by model results corresponding to predicted cooling trajectories is shown in Figure DR3a. The grain analyzed for  $^4\text{He}/^3\text{He}$  analysis, apatite grain ScT2-1\_a, was a euhedral grain with no visible inclusions, had a bulk AHe age of  $211 \pm 5$  Ma, which is within error of ScT1’s average AHe age ( $219.2 \pm 17.9$ , Table 1).  $^4\text{He}/^3\text{He}$  ratios increase systematically with  $\Sigma F_{^3\text{He}}$  except for the last two steps, which encroached upon the forbidden zone and were therefore eliminated from model scoring (Shuster and Farley, 2005). We forward modeled cooling histories for ScT2’s diffusion profile from  $135^\circ\text{C}$  to  $10^\circ\text{C}$  (surface temperature) for 400 Ma ( $\sim 2\times$  the grain age) in 1 Ma steps for 3,000 iterations allowing for 3-10 points (or bends) in the modeled t-T histories. ScT2 was the only analyzed apatite whose models produced any cooling trajectories with acceptable fits to the measured  $^4\text{He}/^3\text{He}$  release spectrum. Acceptable fit cooling trajectories for ScT2 show a three stage cooling history: 1) cooling to  $\sim 55\text{-}40^\circ\text{C}$  by  $\sim 350\text{-}250$  Ma, 2) a long period of slow to stagnant cooling, and 3) renewed rapid cooling from  $50\text{-}30^\circ\text{C}$  to the surface beginning between 125-20 Ma (Fig. DR3a). The results of this model introduce the possibility for renewed exhumation in the Cretaceous through the Cenozoic at the Cluanie field site.

ScT1's  $^4\text{He}/^3\text{He}$  ratio evolution diagram, representing its He diffusion profile (Table DR2), overlain by model results corresponding to predicted cooling trajectories is shown in Figure DR3b. The grain analyzed for  $^4\text{He}/^3\text{He}$  analysis, apatite grain ScT1-3\_c, was a euhedral grain with no visible inclusions, had a bulk AHe age of  $111.0 \pm 2.0$  Ma. This grain age was not within error of ScT1's average AHe age ( $56.3 \pm 17.9$ , Table 1). This was our first clue that we may have difficulties interpreting the  $^4\text{He}/^3\text{He}$  model results.  $^4\text{He}/^3\text{He}$  ratios increase systematically with  $\Sigma F_{3\text{He}}$  except for steps 1, 2, and 3 were below the detection limit step 20 which encroached upon the forbidden zone and were eliminated prior to modeling (Shuster and Farley, 2005). We forward modeled cooling histories for ScT1's diffusion profile from  $135^\circ\text{C}$  to  $10^\circ\text{C}$  (surface temperature) for 200 Ma ( $\sim 2\times$  the grain age) in 1 Ma steps for 3,000 iterations allowing for 3-10 points (or bends) in the modeled t-T histories. Due to the large number of steps that needed to be eliminated from model scoring, the analyzed apatite's bulk AHe age that is not within error of ScT1's average AHe age, and because no cooling trajectories with an acceptable fit to the measured  $^4\text{He}/^3\text{He}$  release spectrum were found, likely a result of due to unconstrained U-Th zonation in the apatite, we do not attempt to interpret this data any further.

ScT11's  $^4\text{He}/^3\text{He}$  ratio evolution diagram, representing its He diffusion profile (Table DR2), overlain by model results corresponding to predicted cooling trajectories is shown in Figure DR3c. ScT11's average AHe age of  $83.3 \pm 20.8$  Ma was used in the  $^4\text{He}/^3\text{He}$  modeling (Table 1).  $^4\text{He}/^3\text{He}$  ratios increase systematically with  $\Sigma F_{3\text{He}}$  and no steps were eliminated from the scoring of model fits. We forward modeled cooling histories for ScT11's diffusion profile from  $135^\circ\text{C}$  to  $10^\circ\text{C}$  (surface temperature) for 200



Ma ( $\sim 2\times$  the average age) in 1 Ma steps for 3,000 iterations allowing for 3-10 points (or bends) in the modeled t-T histories. No cooling trajectories with an acceptable fit to the measured  $^4\text{He}/^3\text{He}$  release spectrum were found for sample ScT11, likely a result of due to unconstrained U-Th zonation in the apatite, we do not attempt to interpret this data any further.

ScT10's  $^4\text{He}/^3\text{He}$  ratio evolution diagram, representing its He diffusion profile (Table DR2), overlain by model results corresponding to predicted cooling trajectories is shown in Figure DR3d. ScT10's average AHe age of  $108.4 \pm 22.3$  Ma was used in the  $^4\text{He}/^3\text{He}$  modeling (Table 1).  $^4\text{He}/^3\text{He}$  ratios increase systematically with  $\Sigma F_{3\text{He}}$  until the last two steps (steps 18 and 19) where  $R_{\text{step}}/R_{\text{bulk}}$  values jump from 1.252 in step 17 to 1.582 in step 18 and 2.589 in step 19 (Table DR2). This large jump in  $^4\text{He}/^3\text{He}$  ratios may indicate a  $^4\text{He}$  rich inclusion near the grain edge. Steps 18 and 19 were therefore eliminated in the scoring of model fits. We forward modeled cooling histories for ScT10's diffusion profile from  $135^\circ\text{C}$  to  $10^\circ\text{C}$  (surface temperature) for 200 Ma ( $\sim 2\times$  the average age) in 1 Ma steps for 3,000 iterations allowing for 3-10 points (or bends) in the modeled t-T histories. Due to the possibility of a  $^4\text{He}$  rich inclusion in the analyzed apatite and because no cooling trajectories with an acceptable fit to the measured  $^4\text{He}/^3\text{He}$  release spectrum were found for sample ScT10, we do not attempt to interpret this data any further.

Figure DR3:  $^4\text{He}/^3\text{He}$  analysis and model results are shown for samples A) ScT2 from Cluanie, and B) ScT1 from Invershiel and samples C) ScT11 and D) ScT10 from Glen Nevis. The left graph in each box is the  $^4\text{He}/^3\text{He}$  release spectrum for each sample shown as a ratio evolution diagram where the  $^4\text{He}/^3\text{He}$  ratio (R) of each step ( $R_{\text{step}}$ ) is normalized

116 to the total  $^4\text{He}/^3\text{He}$  ratio ( $R_{\text{bulk}}$ ) and is a function of the cumulative released fraction of  
117  $^3\text{He}$  ( $\Sigma F_{^3\text{He}}$ ). The right graph shows modeled time temperature cooling trajectories. The  
118 grey paths correspond to cooling trajectories that do not predict the bulk AHe age of the  
119 sample, and therefore they are not compared to the measured  $^4\text{He}/^3\text{He}$  release spectrum.  
120 Cooling trajectories represented by green, yellow, and red paths predict the bulk AHe age  
121 of the sample. Green paths represent cooling trajectories with an acceptable fit to the  
122 measured  $^4\text{He}/^3\text{He}$  release spectrum. Yellow and red paths correspond to cooling  
123 trajectories that are increasingly worse fits to the data and which can be excluded as  
124 fitting the data at a 99% confidence level (see Schildgen et al., 2010 for a more detailed  
125 discussion of modeling). The ratio evolution diagram is overlain by predicted  $^4\text{He}/^3\text{He}$   
126 release spectrums resulting from the modeled cooling trajectories. Only sample ScT2  
127 produced any acceptable fit-paths.  
128 Table DR2. Apatite  $^4\text{He}/^3\text{He}$  data

129

Fig  
DR1

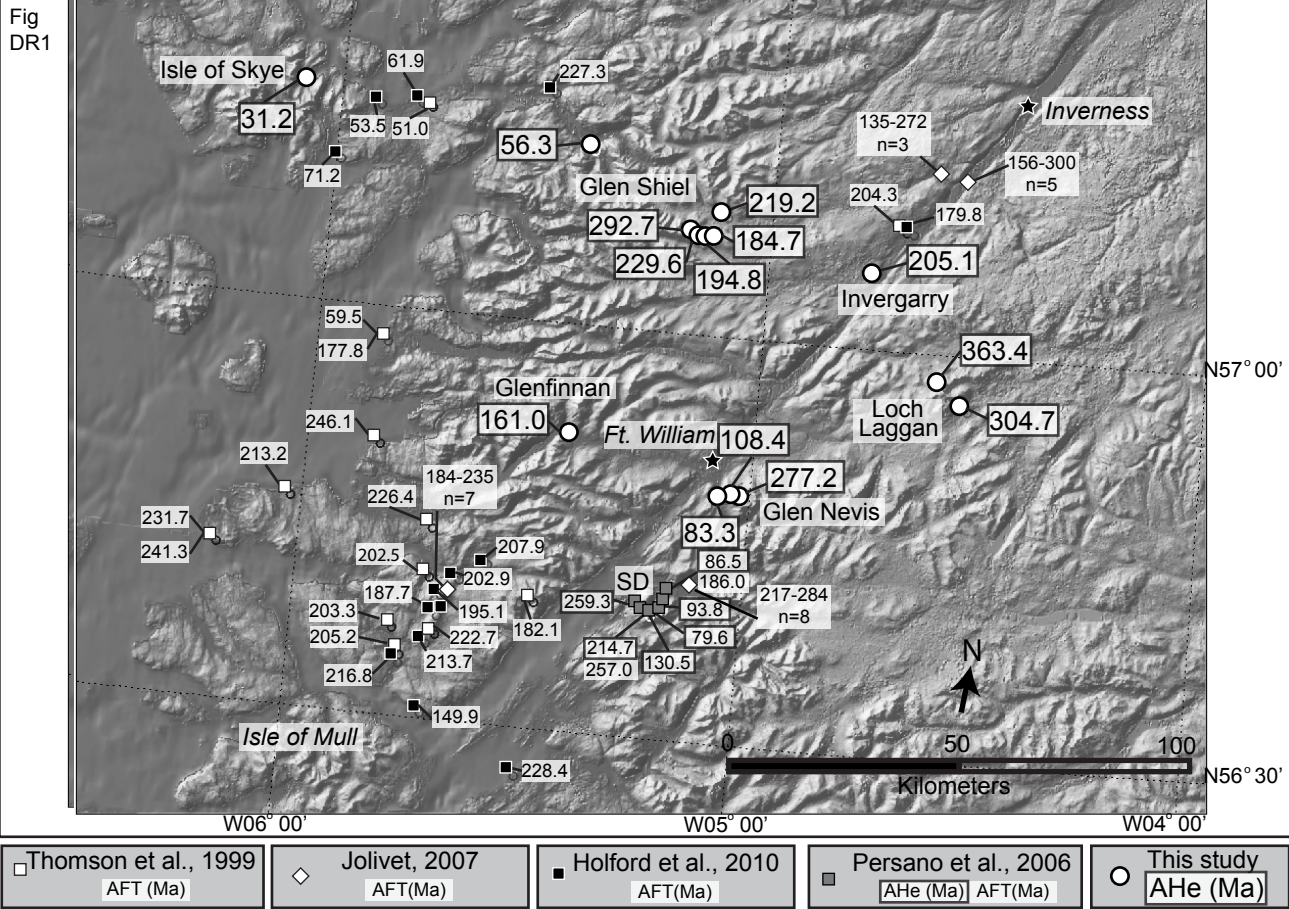

Fig DR2

- Aliquots used to calculate average AHe age
- ◇ Aliquots culled prior to average AHe age calculation

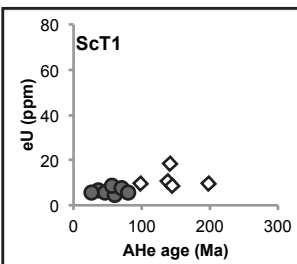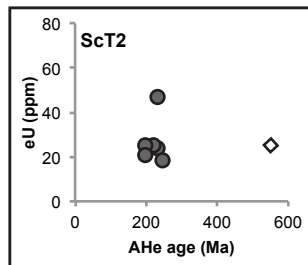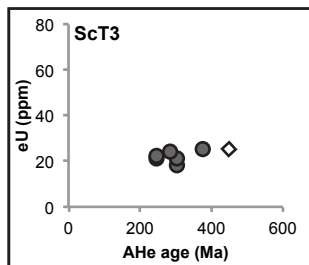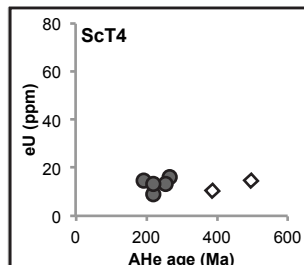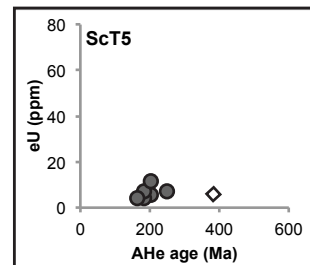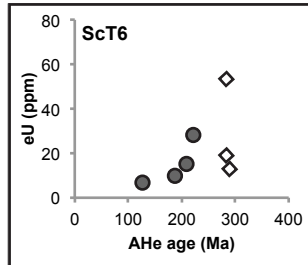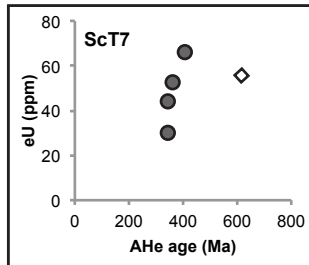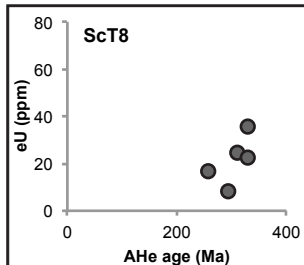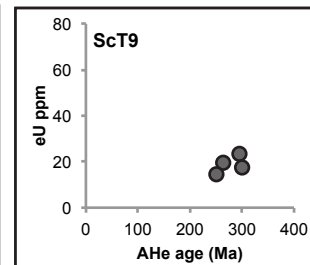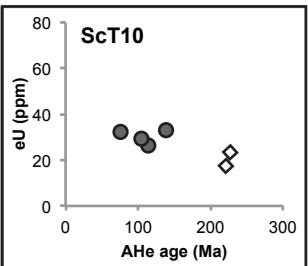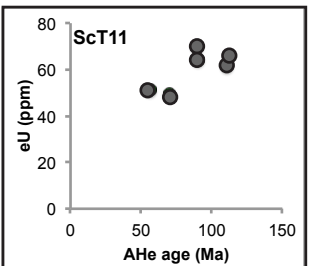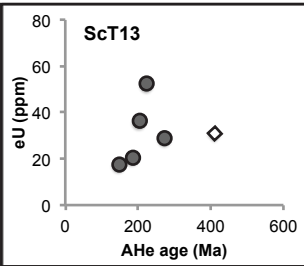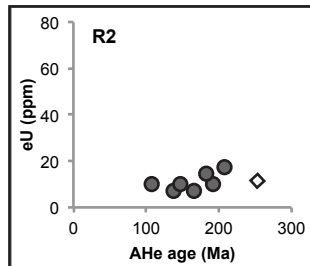

**A.****ScT-2 (apatite ScT2-1\_a)**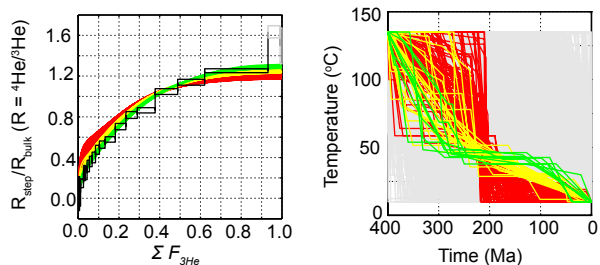**B.****ScT-1 (apatite ScT1-3\_c)**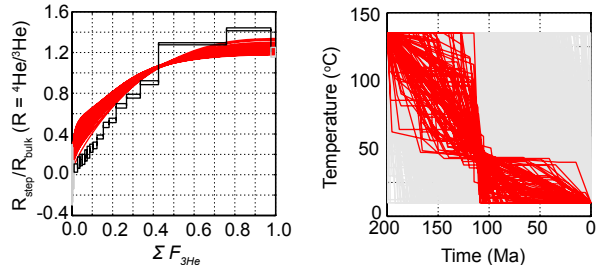**C.****ScT-11 (ScT11-1\_a)**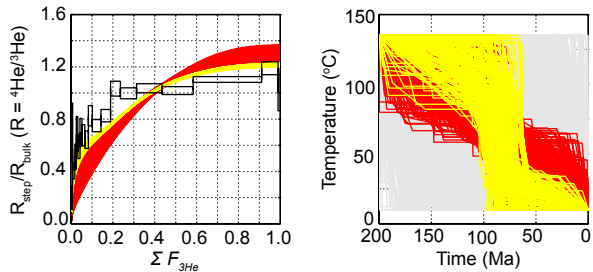**D.****ScT-10 (ScT10-1\_a)**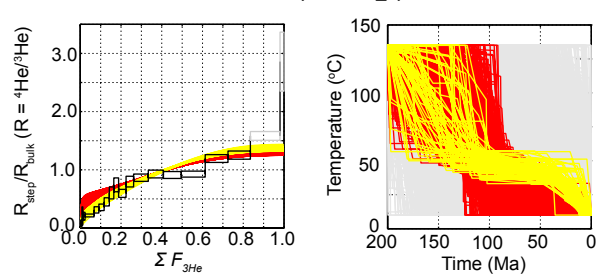

**Fame, M.L., Spotila, J.A., Owen, L.A., Dortch, J.M., and Shuster, D.L., 2018, Spatially heterogeneous post-Caledonian burial and exhumation across the Scottish Highlands: Lithosphere, <https://doi.org/10.1130/L678.1>.**

**GSA Data Repository Item 2018139**

TABLE DR1. QtQt FORWARD MODEL INPUT PARAMETERS

| FM-1   |        | FM-2   |        | FM-3   |        | FM-4   |        |
|--------|--------|--------|--------|--------|--------|--------|--------|
| t (Ma) | T (°C) |
| 0      | 10     | 0      | 10     | 0      | 10     | 0      | 10     |
| 15     | 65     | 55     | 35     | 70     | 35     | 90     | 25     |
| 55     | 35     | 60     | 95     | 90     | 25     | 110    | 25     |
| 60     | 95     | 66     | 15     | 110    | 25     | 130    | 75     |
| 66     | 15     | 70     | 35     | 130    | 75     | 140    | 75     |
| 70     | 35     | 90     | 25     | 140    | 75     | 200    | 15     |
| 90     | 25     | 110    | 25     | 200    | 15     | 225    | 115    |
| 110    | 25     | 130    | 75     | 225    | 115    | 245    | 115    |
| 130    | 75     | 140    | 75     | 245    | 115    | 350    | 35     |
| 140    | 75     | 200    | 15     | 350    | 35     |        |        |
| 200    | 15     | 225    | 115    |        |        |        |        |
| 225    | 115    | 245    | 115    |        |        |        |        |
| 245    | 115    | 350    | 35     |        |        |        |        |
| 350    | 35     |        |        |        |        |        |        |
| FM-1   |        | FM-2   |        | FM-3   |        | FM-4   |        |
| t (Ma) | T (°C) |
| 0      | 10     | 0      | 10     | 0      | 10     | 0      | 10     |
| 130    | 75     | 200    | 15     | 225    | 115    | 350    | 35     |
| 140    | 75     | 225    | 115    | 245    | 115    |        |        |
| 200    | 15     | 245    | 115    | 350    | 35     |        |        |
| 225    | 115    | 350    | 35     |        |        |        |        |
| 245    | 115    |        |        |        |        |        |        |
| 350    | 35     |        |        |        |        |        |        |

*Note:* Input time temperature points for QtQt forward thermal models (displayed in Figure 4A) based on a simplification of Holford et al. (2010) Morvern thermal history.

Fame, M.L., Spotila, J.A., Owen, L.A., Dortch, J.M., and Shuster, D.L., 2018,  
Spatially heterogeneous post-Caledonian burial and exhumation across the  
Scottish Highlands: Lithosphere, <https://doi.org/10.1130/L678.1>.

GSA Data Repository Item 2018139

TABLE DR2. APATITE  $^4\text{He}/^3\text{He}$  DATA

| Sample information          | Heating step | Temperature<br>(°C) | Step duration<br>(hours) | ( $\Sigma F_{3\text{He}}$ ) * | $R_{\text{step}}/R_{\text{bulk}}$ † | $R_{\text{step}}/R_{\text{bulk}}$<br>error (±) † |
|-----------------------------|--------------|---------------------|--------------------------|-------------------------------|-------------------------------------|--------------------------------------------------|
| <b>Sample Name</b>          | 1            | 210                 | 0.20                     | 0.003                         | 0.051                               | 0.164                                            |
| ScT2 (apatite ScT2-1_a)     | 2            | 225                 | 0.50                     | 0.006                         | 0.044                               | 0.165                                            |
|                             | 3            | 260                 | 0.38                     | 0.011                         | 0.055                               | 0.131                                            |
| <b>Radial equivalence:</b>  | 4            | 300                 | 0.51                     | 0.026                         | 0.147                               | 0.043                                            |
| 86.0 $\mu\text{m}$          | 5            | 300                 | 0.66                     | 0.034                         | 0.248                               | 0.075                                            |
|                             | 6            | 310                 | 0.66                     | 0.043                         | 0.247                               | 0.065                                            |
| <b>Apatite ScT2-1_a age</b> | 7            | 330                 | 0.46                     | 0.055                         | 0.316                               | 0.057                                            |
| 211.0 ± 5.0 Ma §            | 8            | 340                 | 0.45                     | 0.068                         | 0.362                               | 0.051                                            |
|                             | 9            | 350                 | 0.48                     | 0.085                         | 0.401                               | 0.052                                            |
| <b>U (ppm)</b>              | 10           | 350                 | 0.66                     | 0.104                         | 0.476                               | 0.044                                            |
| 7.6                         | 11           | 370                 | 0.53                     | 0.132                         | 0.527                               | 0.036                                            |
|                             | 12           | 400                 | 0.48                     | 0.182                         | 0.578                               | 0.027                                            |
| <b>Th (ppm)</b>             | 13           | 410                 | 0.50                     | 0.234                         | 0.704                               | 0.031                                            |
| 0.1                         | 14           | 420                 | 0.56                     | 0.290                         | 0.818                               | 0.033                                            |
|                             | 15           | 440                 | 0.63                     | 0.378                         | 0.864                               | 0.026                                            |
| <b>Model iterations</b>     | 16           | 475                 | 0.50                     | 0.488                         | 1.048                               | 0.028                                            |
| 3000                        | 17           | 500                 | 0.50                     | 0.620                         | 1.139                               | 0.029                                            |
|                             | 18           | 600                 | 0.50                     | 0.932                         | 1.253                               | 0.020                                            |
|                             | 19 #         | 700                 | 0.50                     | 0.991                         | 1.634                               | 0.060                                            |
|                             | 20 #         | 850                 | 0.50                     | 1.000                         | 1.496                               | 0.176                                            |
| <b>Sample Name</b>          | 1 #          | 210                 | 0.20                     | 0.003                         | BDL **                              | 0.298                                            |
| ScT1 (apatite ScT1-3_c)     | 2 #          | 225                 | 0.50                     | 0.005                         | BDL **                              | 0.268                                            |
|                             | 3 #          | 260                 | 0.38                     | 0.011                         | BDL **                              | 0.137                                            |
| <b>Radial equivalence:</b>  | 4            | 300                 | 0.51                     | 0.028                         | 0.066                               | 0.041                                            |
| 83.0 $\mu\text{m}$          | 5            | 300                 | 0.66                     | 0.040                         | 0.119                               | 0.056                                            |
|                             | 6            | 310                 | 0.66                     | 0.051                         | 0.145                               | 0.056                                            |
| <b>Apatite ScT1-3_c age</b> | 7            | 330                 | 0.46                     | 0.063                         | 0.151                               | 0.049                                            |
| 111.0 ± 2.0 Ma §            | 8            | 340                 | 0.45                     | 0.075                         | 0.189                               | 0.055                                            |
|                             | 9            | 350                 | 0.48                     | 0.088                         | 0.221                               | 0.058                                            |
| <b>U (ppm)</b>              | 10           | 350                 | 0.66                     | 0.103                         | 0.260                               | 0.040                                            |
| 11.1                        | 11           | 370                 | 0.53                     | 0.123                         | 0.288                               | 0.032                                            |
|                             | 12           | 400                 | 0.48                     | 0.155                         | 0.370                               | 0.019                                            |
| <b>Th (ppm)</b>             | 13           | 410                 | 0.50                     | 0.183                         | 0.489                               | 0.026                                            |
| 0.1                         | 14           | 420                 | 0.56                     | 0.217                         | 0.534                               | 0.022                                            |
|                             | 15           | 435                 | 0.50                     | 0.268                         | 0.676                               | 0.022                                            |
| <b>Model iterations</b>     | 16           | 475                 | 0.50                     | 0.336                         | 0.772                               | 0.019                                            |
| 3000                        | 17           | 500                 | 0.50                     | 0.425                         | 0.904                               | 0.019                                            |
|                             | 18           | 600                 | 0.50                     | 0.759                         | 1.286                               | 0.010                                            |
|                             | 19           | 700                 | 0.50                     | 0.977                         | 1.428                               | 0.015                                            |
|                             | 20 #         | 850                 | 0.50                     | 1.000                         | 1.203                               | 0.047                                            |
| <b>Sample Name</b>          | 1            | 210                 | 0.20                     | 0.003                         | 0.052                               | 0.033                                            |
| ScT11 (apatite ScT11_a)     | 2            | 225                 | 0.50                     | 0.006                         | 0.197                               | 0.091                                            |
|                             | 3            | 260                 | 0.38                     | 0.008                         | 0.573                               | 0.349                                            |
| <b>Radial equivalence:</b>  | 4            | 300                 | 0.51                     | 0.018                         | 0.405                               | 0.061                                            |
| 69.8 $\mu\text{m}$          | 5            | 300                 | 0.66                     | 0.025                         | 0.512                               | 0.096                                            |
|                             | 6            | 310                 | 0.66                     | 0.032                         | 0.687                               | 0.134                                            |
| <b>Average age</b>          | 7            | 330                 | 0.46                     | 0.043                         | 0.580                               | 0.082                                            |
| 83.3 ± 20.8 Ma              | 8            | 340                 | 0.45                     | 0.052                         | 0.700                               | 0.106                                            |
|                             | 9            | 350                 | 0.48                     | 0.066                         | 0.677                               | 0.081                                            |
| <b>U (ppm)</b>              | 10           | 350                 | 0.66                     | 0.083                         | 0.642                               | 0.066                                            |
| 38.6                        | 11           | 370                 | 0.53                     | 0.102                         | 0.826                               | 0.078                                            |
|                             | 12           | 400                 | 0.48                     | 0.143                         | 0.750                               | 0.046                                            |
| <b>Th (ppm)</b>             | 13           | 410                 | 0.50                     | 0.189                         | 0.827                               | 0.047                                            |
| 80.6                        | 14           | 420                 | 0.56                     | 0.236                         | 1.033                               | 0.057                                            |
|                             | 15           | 440                 | 0.63                     | 0.313                         | 0.997                               | 0.042                                            |
| <b>Model iterations</b>     | 16           | 475                 | 0.50                     | 0.435                         | 1.036                               | 0.035                                            |
| 3000                        | 17           | 500                 | 0.50                     | 0.584                         | 1.018                               | 0.030                                            |
|                             | 18           | 600                 | 0.50                     | 0.911                         | 1.103                               | 0.022                                            |
|                             | 19           | 700                 | 0.50                     | 0.989                         | 1.189                               | 0.049                                            |
|                             | 20           | 850                 | 0.50                     | 1.000                         | 1.004                               | 0.140                                            |
| <b>Sample Name</b>          | 1            | 210                 | 0.20                     | 0.008                         | 0.077                               | 0.058                                            |
| ScT10 (apatite ScT10_a)     | 2            | 225                 | 0.50                     | 0.012                         | 0.207                               | 0.156                                            |
|                             | 3            | 260                 | 0.38                     | 0.023                         | 0.202                               | 0.067                                            |
| <b>Radial equivalence:</b>  | 4            | 300                 | 0.51                     | 0.068                         | 0.215                               | 0.024                                            |
| 50.0 $\mu\text{m}$          | 5            | 300                 | 0.66                     | 0.091                         | 0.311                               | 0.054                                            |
|                             | 6            | 310                 | 0.66                     | 0.117                         | 0.355                               | 0.056                                            |
|                             | 7            | 330                 | 0.46                     | 0.143                         | 0.449                               | 0.070                                            |
| <b>Average age</b>          | 8            | 340                 | 0.45                     | 0.165                         | 0.603                               | 0.103                                            |
| 108.4 ± 22.3 Ma             | 9            | 350                 | 0.48                     | 0.188                         | 0.742                               | 0.119                                            |
|                             | 10           | 350                 | 0.66                     | 0.225                         | 0.595                               | 0.069                                            |
| <b>U (ppm)</b>              | 11           | 370                 | 0.53                     | 0.262                         | 0.798                               | 0.092                                            |
| 15.5                        | 12           | 400                 | 0.48                     | 0.334                         | 0.864                               | 0.063                                            |
|                             | 13           | 410                 | 0.50                     | 0.408                         | 0.927                               | 0.067                                            |
| <b>Th (ppm)</b>             | 14           | 420                 | 0.56                     | 0.496                         | 0.911                               | 0.059                                            |
| 46.8                        | 15           | 440                 | 0.63                     | 0.613                         | 0.926                               | 0.051                                            |
|                             | 16           | 475                 | 0.50                     | 0.725                         | 1.193                               | 0.067                                            |

|                         |      |     |      |       |       |       |
|-------------------------|------|-----|------|-------|-------|-------|
| <b>Model iterations</b> | 17   | 500 | 0.50 | 0.835 | 1.252 | 0.070 |
| 3000                    | 18 # | 600 | 0.50 | 0.981 | 1.582 | 0.075 |
|                         | 19 # | 700 | 0.50 | 1.000 | 2.859 | 0.507 |

---

\* Cumulative released fraction of  $^4\text{He}$

†  $R_{step}$  is the  $^4\text{He}/^3\text{He}$  ratio of each step and is normalized to  $R_{bulk}$ , the total  $^4\text{He}/^3\text{He}$  ratio.

§ Due to low analytical error on bulk grain age we input 2x error in model runs to allow more t-T paths to be compared to release spectrum

# Indicates step was removed from the model scoring.

\*\* Below Detection Limit

---
